# Supplementary material for: Desmin-related myopathy manifested by various types of arrhythmias: a case report and literature review
Source: PubMed Central journal article supplement — J Int Med Res. 2024 Nov 5;52(11):03000605241291741. doi: 10.1177/03000605241291741 (PMC11539263; doi:10.1177/03000605241291741), 2024-11-05
Supplement: sj-pdf-1-imr-10.1177_03000605241291741.pdf [file sj-pdf-1-imr-10.1177_03000605241291741.pdf]

## Supplementary Data

### Abbreviations

|              |                                                     |
|--------------|-----------------------------------------------------|
| <b>ACM</b>   | arrhythmogenic cardiomyopathy                       |
| <b>AF</b>    | atrial fibrillation                                 |
| <b>AFL</b>   | atrial flutter                                      |
| <b>AT</b>    | atrial tachycardia                                  |
| <b>AVB</b>   | atrioventricular block                              |
| <b>bpm</b>   | beats per minute                                    |
| <b>CAVB</b>  | complete atrioventricular block                     |
| <b>CPR</b>   | cardiopulmonary resuscitation                       |
| <b>CK</b>    | creatine kinase                                     |
| <b>DCM</b>   | dilated cardiomyopathy                              |
| <b>DES</b>   | Desmin                                              |
| <b>DRM</b>   | Desmin-related myopathy                             |
| <b>EMG</b>   | electromyogram                                      |
| <b>HCM</b>   | hypertrophic cardiomyopathy                         |
| <b>HF</b>    | heart failure                                       |
| <b>ICD</b>   | implantable cardioverter defibrillator              |
| <b>LBBB</b>  | left bundle branch block                            |
| <b>LBBP</b>  | left bundle branch pacing                           |
| <b>LVEF</b>  | left ventricular ejection fraction                  |
| <b>MF</b>    | myocardial fibrosis                                 |
| <b>NVM</b>   | non-compaction of ventricular myocardium            |
| <b>PH</b>    | pulmonary hypertension                              |
| <b>PM</b>    | pacemaker                                           |
| <b>PVC</b>   | premature ventricular complex                       |
| <b>RBBB</b>  | right bundle branch block                           |
| <b>RCM</b>   | restrictive cardiomyopathy                          |
| <b>S-ICD</b> | subcutaneous implantable cardioverter defibrillator |
| <b>VAD</b>   | ventricular assist device                           |
| <b>VF</b>    | ventricular fibrillation                            |
| <b>VT</b>    | ventricular tachycardia                             |
